# Supplementary material for: Seasonal analysis of microplastic concentration on the surface of the Guartinaja water body, Bajo Sinú Wetland Complex
Source: Research Square preprint supplement (doi:10.21203/rs.3.rs-8168397/v1), 2026-01-12
Supplement: Supplementary file 1 [file bb66feb9d0b763d18b85592e.docx]

**Online Resource**

Table 1.Microplastic concentration values ​​for each sampling point and their allocation to the model (Sampling 1).

| **Point** | **Concentration (MP_L)** | **FB/L** | **FR /L** | **FL/L** | **ME/L** | **ES/L** | **Division** |
| --- | --- | --- | --- | --- | --- | --- | --- |
| 1 | 7.44 | 6.49 | 0.24 | 0.68 | 0.00 | 0.03 | Entrenamiento |
| 2 | 5.94 | 5.50 | 0.18 | 0.09 | 0.01 | 0.17 | Entrenamiento |
| 3 | 12.10 | 11.13 | 0.14 | 0.24 | 0.38 | 0.22 | Test |
| 4 | 8.48 | 8.33 | 0.05 | 0.08 | 0.00 | 0.02 | Entrenamiento |
| 5 | 8.36 | 8.19 | 0.08 | 0.05 | 0.03 | 0.01 | Entrenamiento |
| 6 | 8.83 | 8.58 | 0.11 | 0.06 | 0.08 | 0.01 | Entrenamiento |
| 7 | 12.25 | 11.88 | 0.14 | 0.09 | 0.13 | 0.02 | Entrenamiento |
| 8 | 7.82 | 7.52 | 0.08 | 0.08 | 0.12 | 0.02 | Entrenamiento |
| 9 | 9.04 | 8.70 | 0.24 | 0.06 | 0.03 | 0.01 | Entrenamiento |
| 10 | 12.66 | 12.53 | 0.09 | 0.03 | 0.00 | 0.01 | Entrenamiento |
| 11 | 6.79 | 6.71 | 0.03 | 0.03 | 0.03 | 0.00 | Entrenamiento |
| 12 | 8.30 | 8.21 | 0.01 | 0.05 | 0.03 | 0.01 | Test |
| 13 | 7.95 | 7.76 | 0.05 | 0.13 | 0.00 | 0.01 | Entrenamiento |
| 14 | 15.25 | 15.13 | 0.10 | 0.02 | 0.01 | 0.00 | Entrenamiento |
| 15 | 12.99 | 12.91 | 0.05 | 0.03 | 0.00 | 0.00 | Entrenamiento |
| 16 | 7.16 | 7.12 | 0.00 | 0.04 | 0.00 | 0.00 | Entrenamiento |
| 17 | 6.34 | 6.23 | 0.06 | 0.03 | 0.01 | 0.01 | Entrenamiento |
| 18 | 10.93 | 10.91 | 0.01 | 0.01 | 0.01 | 0.00 | Entrenamiento |
| 19 | 13.77 | 13.68 | 0.06 | 0.03 | 0.00 | 0.00 | Entrenamiento |
| 20 | 8.96 | 8.93 | 0.03 | 0.01 | 0.00 | 0.00 | Entrenamiento |
| 21 | 8.20 | 8.17 | 0.02 | 0.02 | 0.00 | 0.00 | Entrenamiento |
| 22 | 5.78 | 5.68 | 0.04 | 0.06 | 0.01 | 0.00 | Entrenamiento |
| 23 | 8.98 | 8.81 | 0.08 | 0.06 | 0.03 | 0.00 | Entrenamiento |
| 24 | 8.97 | 8.93 | 0.02 | 0.03 | 0.00 | 0.00 | Entrenamiento |
| 25 | 5.68 | 5.64 | 0.03 | 0.00 | 0.00 | 0.00 | Test |
| 26 | 5.65 | 5.63 | 0.01 | 0.00 | 0.00 | 0.01 | Test |
| 28 | 5.46 | 5.38 | 0.04 | 0.02 | 0.03 | 0.00 | Entrenamiento |
| 29 | 7.68 | 7.63 | 0.01 | 0.03 | 0.00 | 0.01 | Test |
| 30 | 7.48 | 7.37 | 0.09 | 0.02 | 0.00 | 0.00 | Entrenamiento |

Table 2.Microplastic concentration values for each sampling point and their allocation to the model (Sampling 2).

| Point | Concentration (MP_L) | FB/L | FR /L | FL/L | ME/L | ES/L | Division |
| --- | --- | --- | --- | --- | --- | --- | --- |
| 1 | 1.442 | 1.36 | 0.03 | 0.04 | 0.01 | 0.00 | entrenamiento |
| 2 | 1.925 | 1.78 | 0.03 | 0.08 | 0.03 | 0.01 | entrenamiento |
| 3 | 2.742 | 2.59 | 0.01 | 0.12 | 0.01 | 0.02 | entrenamiento |
| 4 | 2.092 | 1.93 | 0.07 | 0.08 | 0.01 | 0.01 | entrenamiento |
| 5 | 1.942 | 1.83 | 0.03 | 0.04 | 0.03 | 0.01 | entrenamiento |
| 6 | 1.858 | 1.68 | 0.05 | 0.05 | 0.08 | 0.00 | test |
| 7 | 1.542 | 1.33 | 0.03 | 0.13 | 0.03 | 0.02 | entrenamiento |
| 8 | 1.217 | 1.11 | 0.01 | 0.08 | 0.02 | 0.00 | entrenamiento |
| 9 | 3.833 | 3.78 | 0.02 | 0.01 | 0.03 | 0.00 | entrenamiento |
| 10 | 1.050 | 0.98 | 0.03 | 0.03 | 0.00 | 0.00 | test |
| 11 | 1.342 | 1.21 | 0.08 | 0.01 | 0.05 | 0.00 | entrenamiento |
| 12 | 1.450 | 1.08 | 0.10 | 0.07 | 0.13 | 0.08 | test |
| 13 | 1.175 | 0.78 | 0.08 | 0.06 | 0.23 | 0.04 | entrenamiento |
| 14 | 0.792 | 0.50 | 0.09 | 0.07 | 0.09 | 0.04 | entrenamiento |
| 15 | 1.400 | 0.97 | 0.08 | 0.00 | 0.36 | 0.00 | entrenamiento |
| 16 | 0.892 | 0.72 | 0.10 | 0.02 | 0.05 | 0.01 | entrenamiento |
| 17 | 1.050 | 0.88 | 0.13 | 0.03 | 0.03 | 0.00 | entrenamiento |
| 18 | 0.958 | 0.73 | 0.15 | 0.01 | 0.07 | 0.00 | entrenamiento |
| 19 | 1.725 | 1.17 | 0.09 | 0.02 | 0.42 | 0.03 | entrenamiento |
| 20 | 1.700 | 1.18 | 0.14 | 0.01 | 0.34 | 0.03 | entrenamiento |
| 21 | 1.292 | 0.91 | 0.14 | 0.01 | 0.23 | 0.00 | entrenamiento |
| 22 | 1.042 | 0.59 | 0.33 | 0.00 | 0.12 | 0.01 | entrenamiento |
| 23 | 0.933 | 0.73 | 0.15 | 0.00 | 0.04 | 0.01 | entrenamiento |
| 24 | 1.275 | 0.81 | 0.13 | 0.04 | 0.28 | 0.02 | test |
| 25 | 1.083 | 0.56 | 0.20 | 0.02 | 0.31 | 0.00 | entrenamiento |
| 26 | 0.725 | 0.45 | 0.09 | 0.03 | 0.16 | 0.00 | test |
| 27 | 1.117 | 0.81 | 0.13 | 0.01 | 0.13 | 0.04 | entrenamiento |
| 28 | 2.092 | 1.78 | 0.19 | 0.04 | 0.03 | 0.05 | test |
| 29 | 1.525 | 1.43 | 0.07 | 0.00 | 0.03 | 0.00 | entrenamiento |
| 30 | 1.600 | 1.48 | 0.06 | 0.03 | 0.03 | 0.01 | División |
